# Supplementary material for: Cross-Modality Alignment of Spatial Transcriptomics, Multiplexed Imaging, and Histology with PHARAOH
Source: Research Square preprint supplement (doi:10.21203/rs.3.rs-9954002/v1), 2026-06-19

# Supplementary Figure 2

**a**

Xenium Human Lung Cancer (10x Genomics)

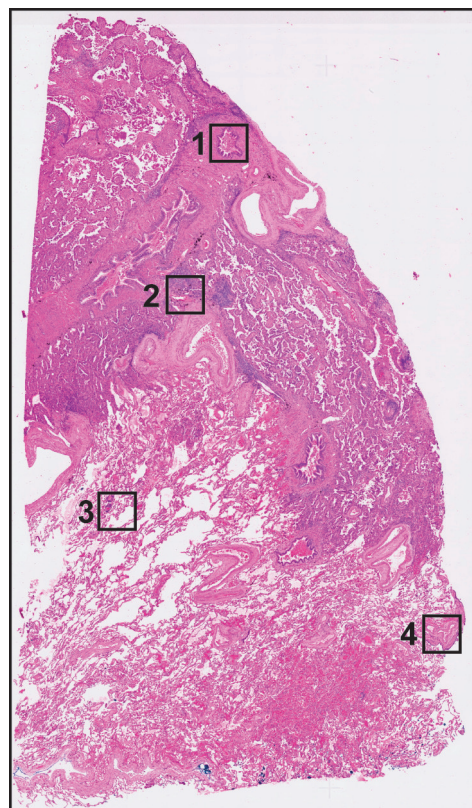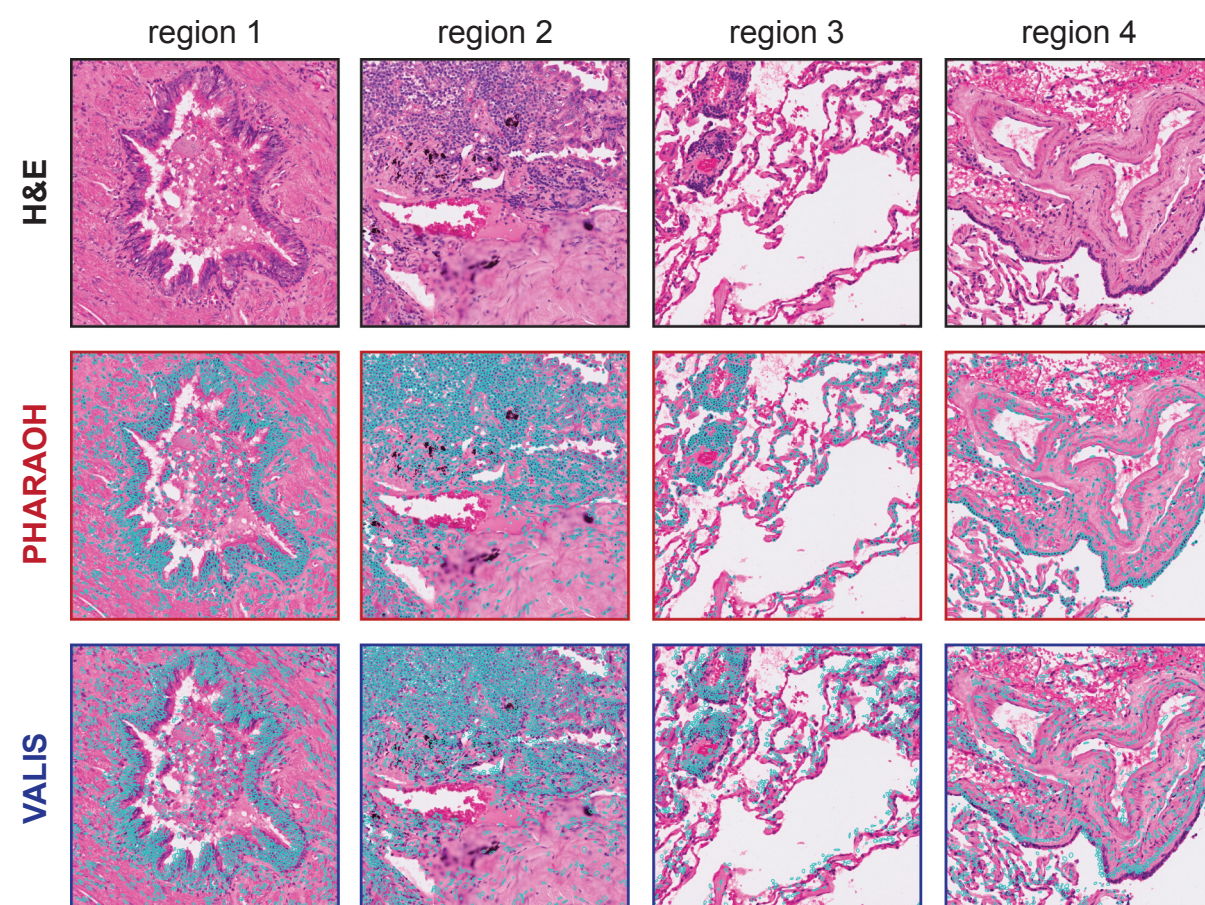

Xenium Nucleus Coverage Scores

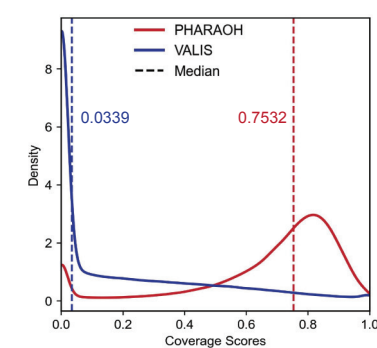

Transcript-to-Nearest-Nucleus Distance

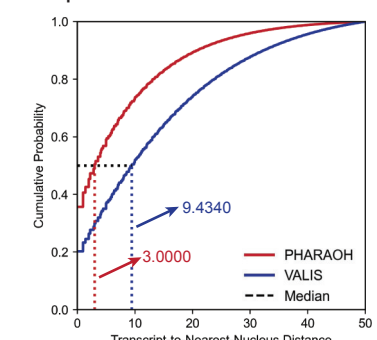

**b**

Xenium Human Lung Cancer LUAD S3

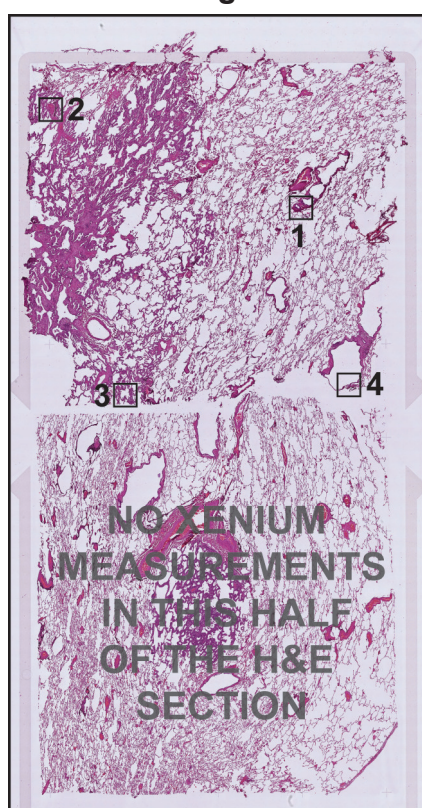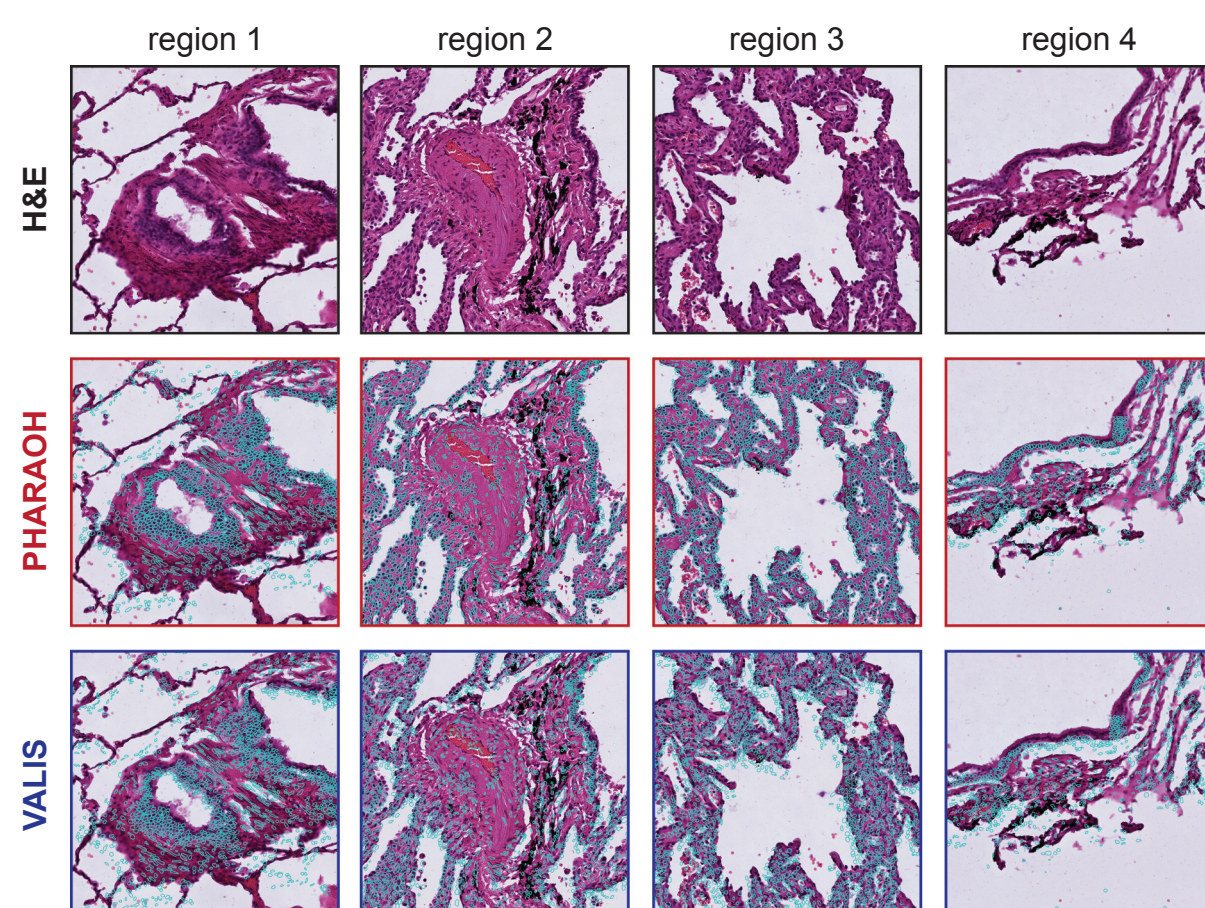

Xenium Nucleus Coverage Scores

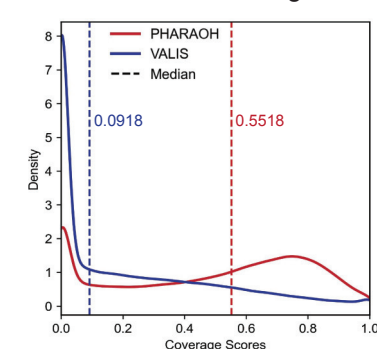

Transcript-to-Nearest-Nucleus Distance

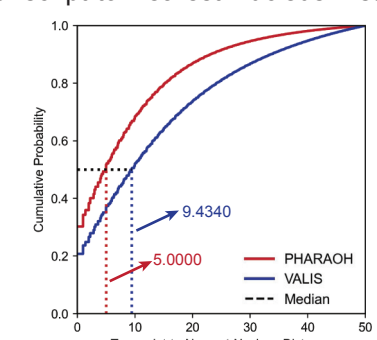

**c**

Xenium Human Lung Cancer LUAD S4

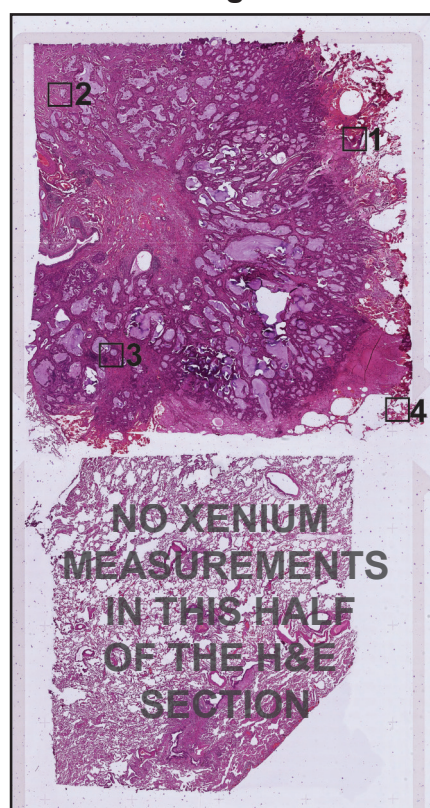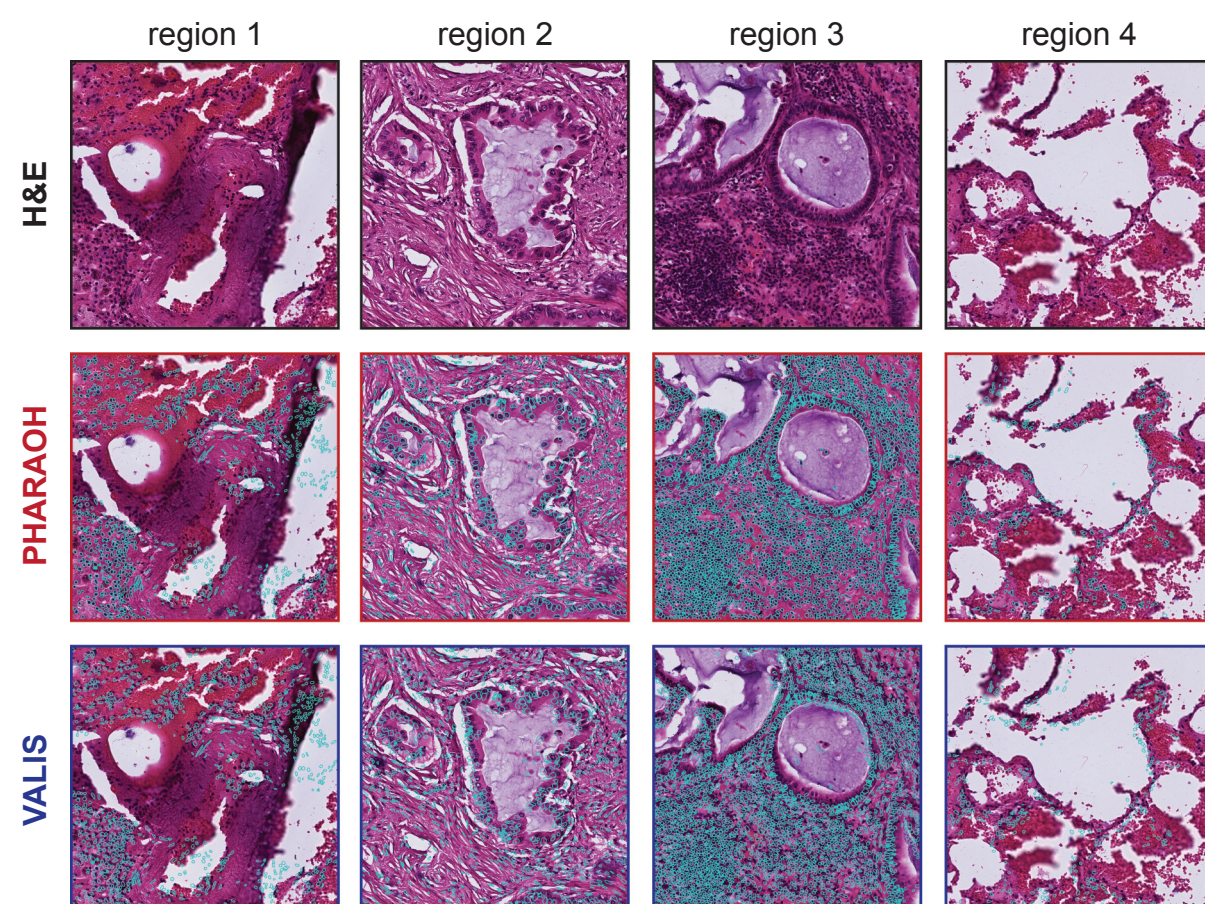

Xenium Nucleus Coverage Scores

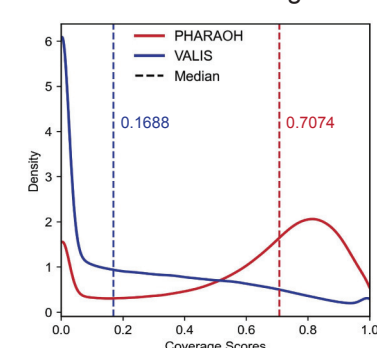

Transcript-to-Nearest-Nucleus Distance

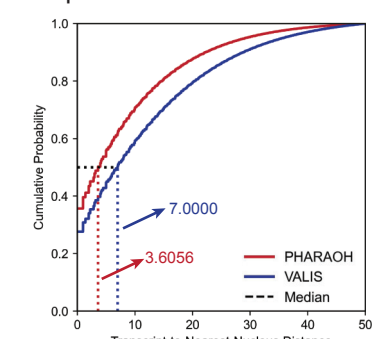

**d**

Xenium Human Lung Cancer LUAD S5

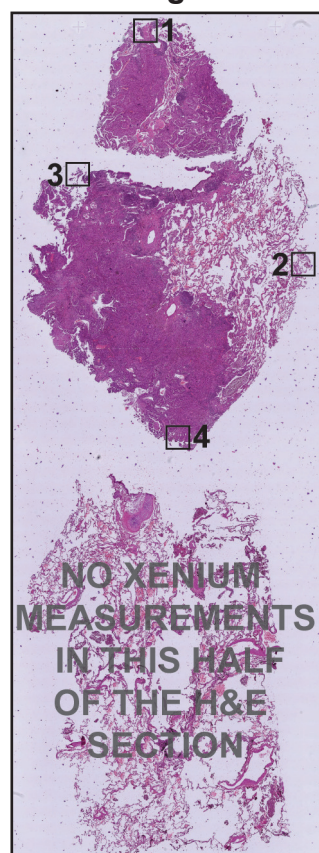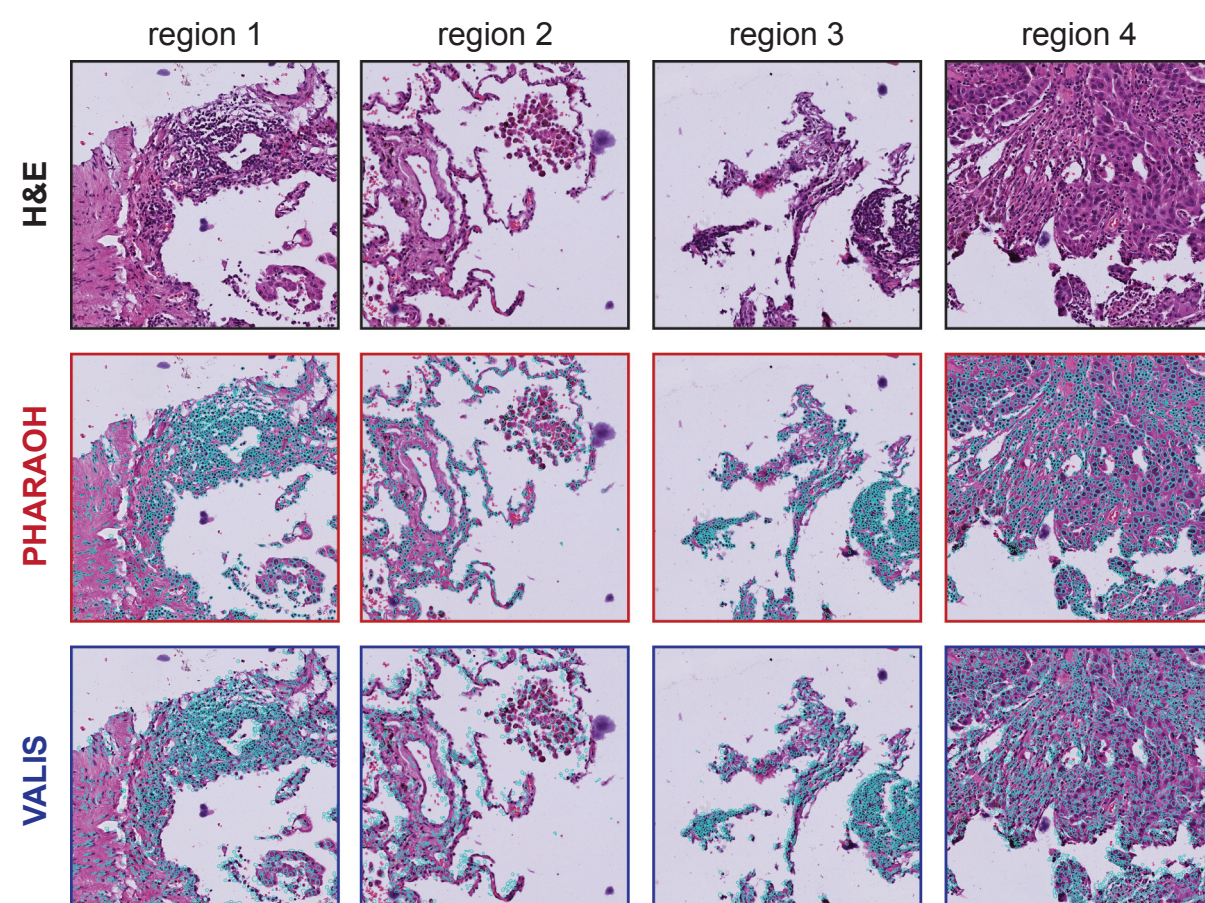

Xenium Nucleus Coverage Scores

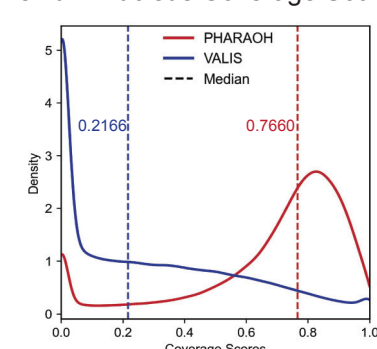

Transcript-to-Nearest-Nucleus Distance

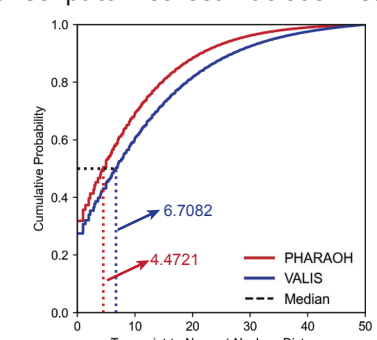

Supplement: Supplementary file 8 [file dc6eafca382b8e769d4aaa84.pdf]
