# Supplementary material for: Cross-Modality Alignment of Spatial Transcriptomics, Multiplexed Imaging, and Histology with PHARAOH
Source: Research Square preprint supplement (doi:10.21203/rs.3.rs-9954002/v1), 2026-06-19

# Supplementary Figure 3

**a**

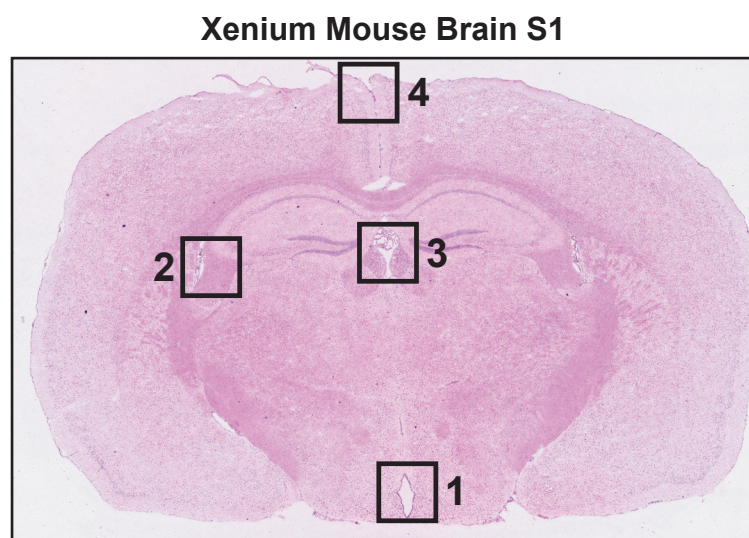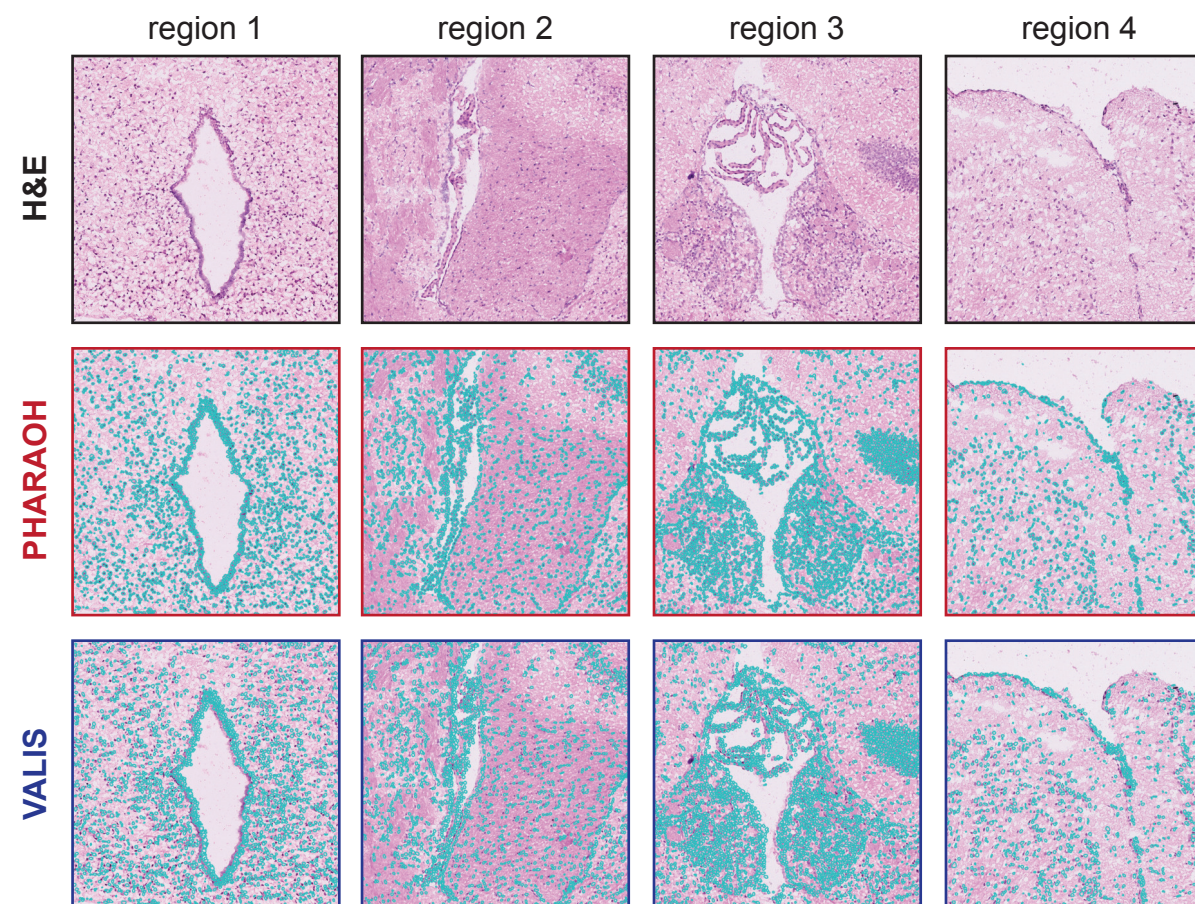

**Xenium Nucleus Coverage Scores**

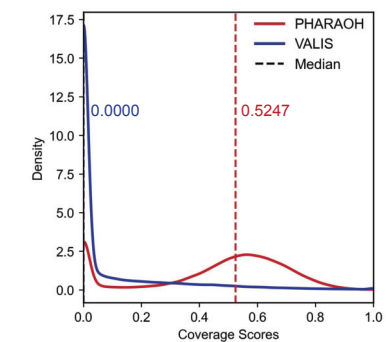

**Transcript-to-Nearest-Nucleus Distance**

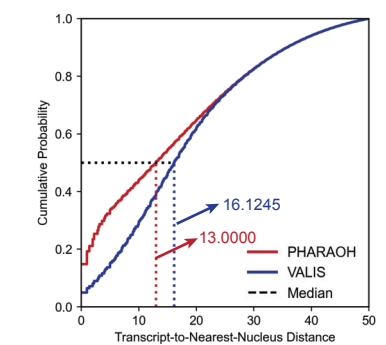

**b**

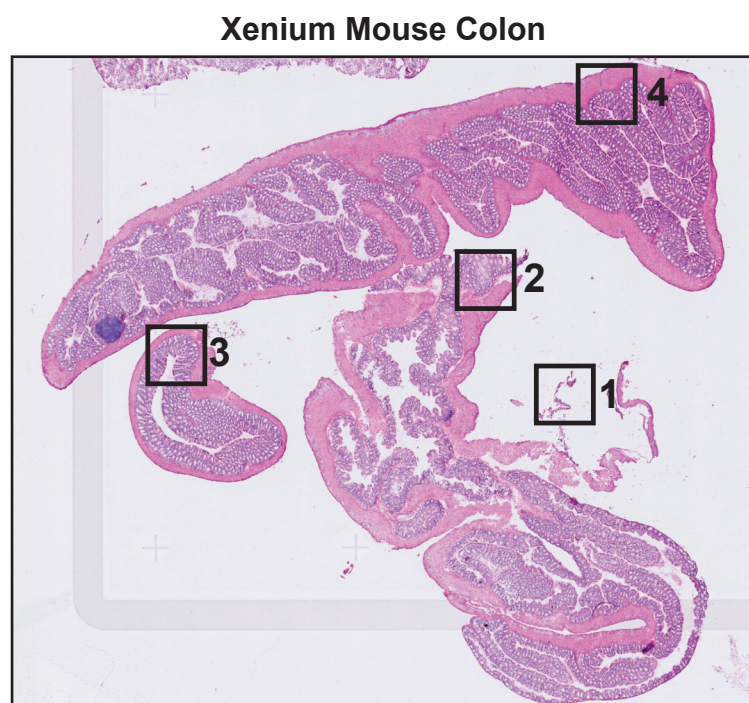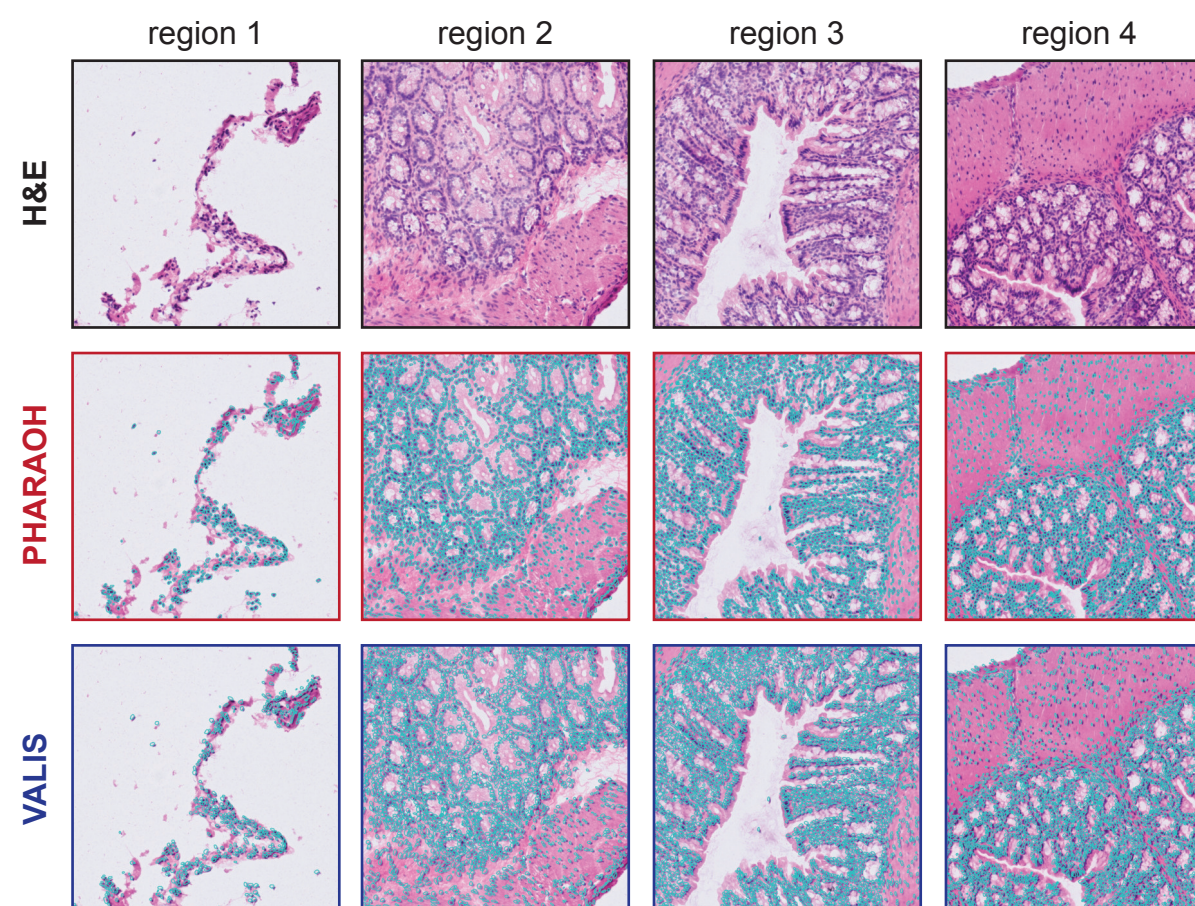

**Xenium Nucleus Coverage Scores**

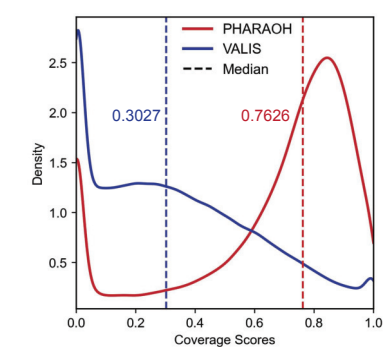

**Transcript-to-Nearest-Nucleus Distance**

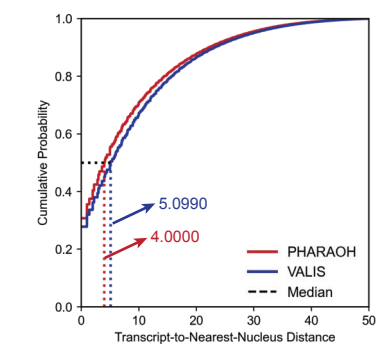

Supplement: Supplementary file 4 [file 82a11c5c96330e96eaaa2ef8.pdf]
