# Supplementary material for: Cross-Modality Alignment of Spatial Transcriptomics, Multiplexed Imaging, and Histology with PHARAOH
Source: Research Square preprint supplement (doi:10.21203/rs.3.rs-9954002/v1), 2026-06-19

# Supplementary Figure 5

Stitched DAPI Whole Section

H&E Whole Section with Aligned FOVs

80%  
Sampled FOVs

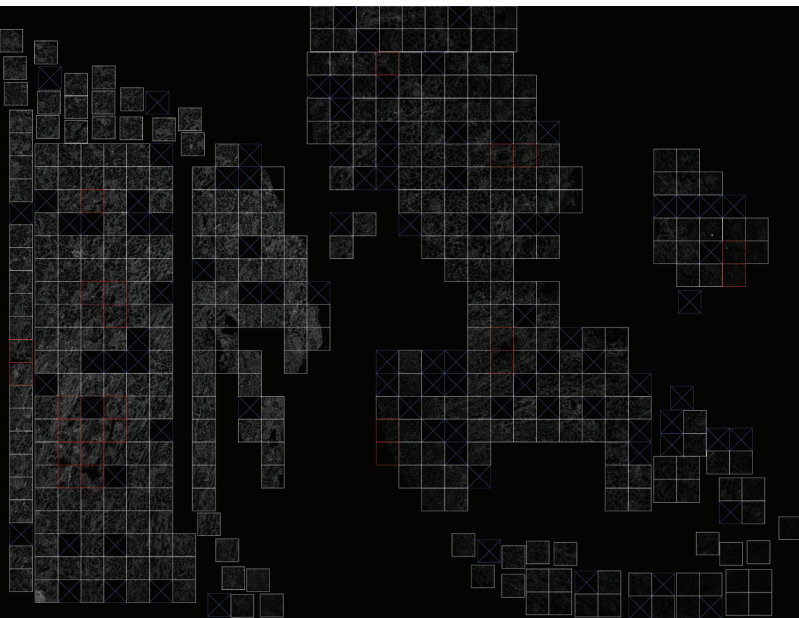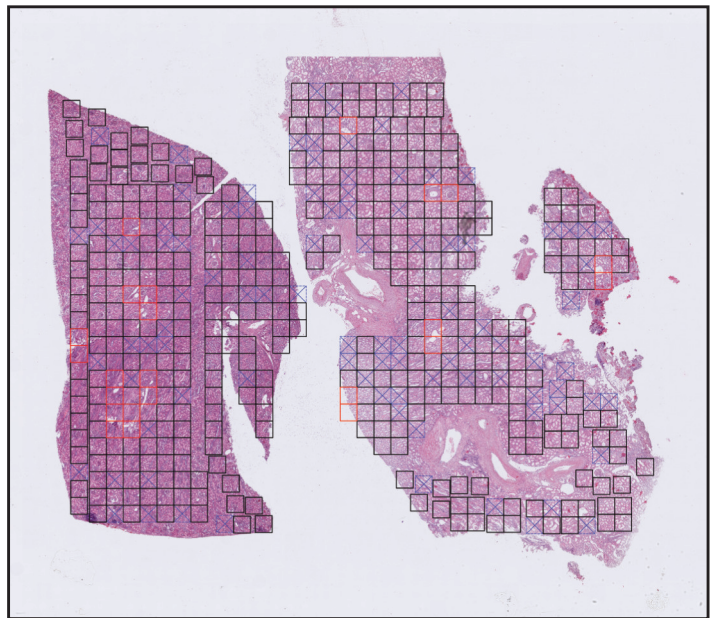

60%  
Sampled FOVs

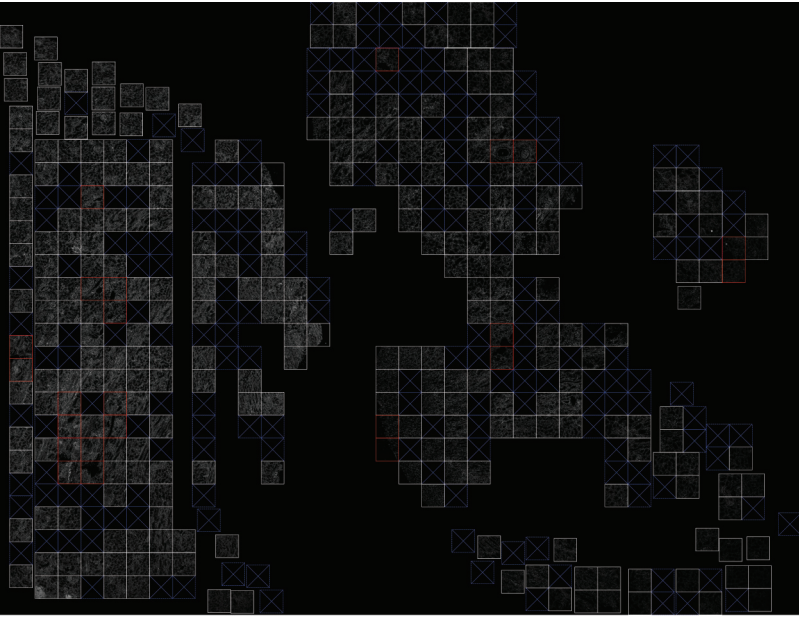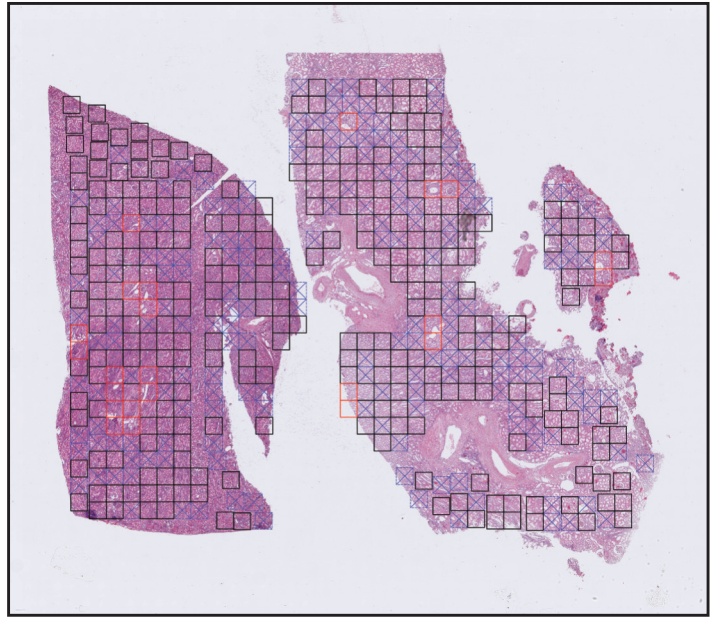

40%  
Sampled FOVs

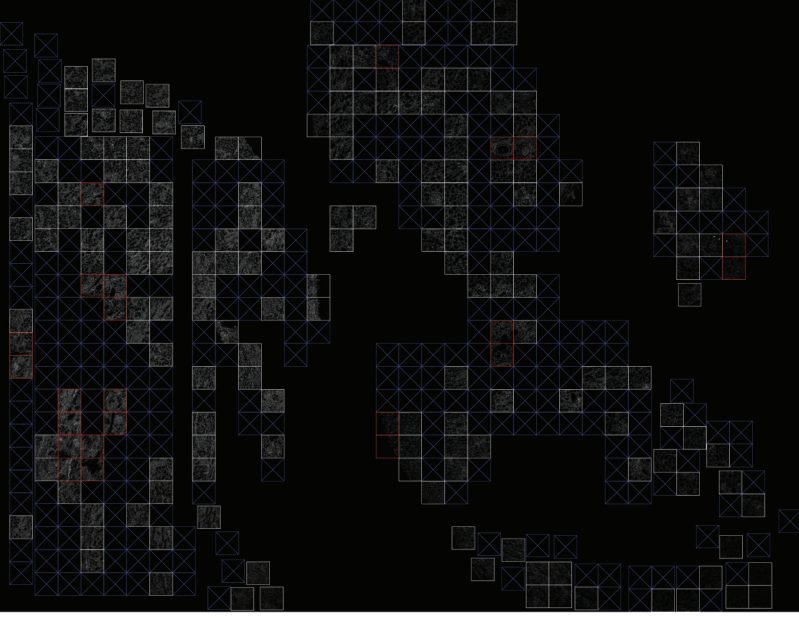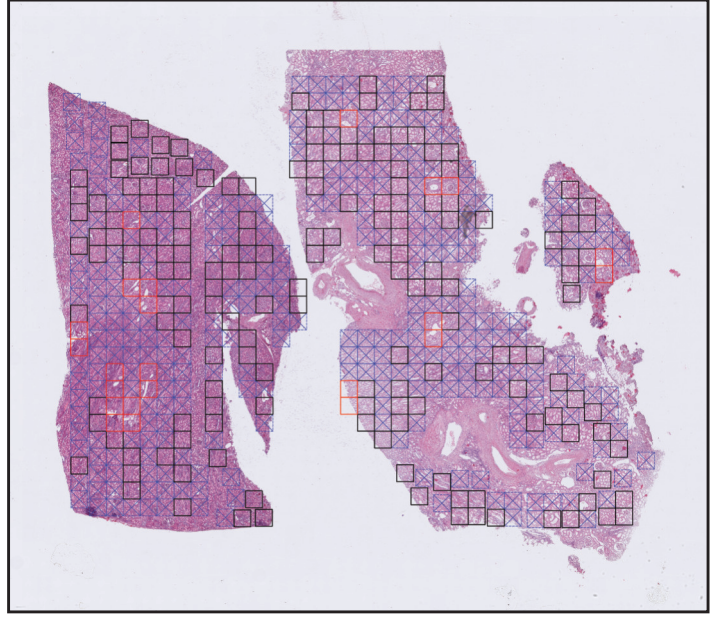

20%  
Sampled FOVs

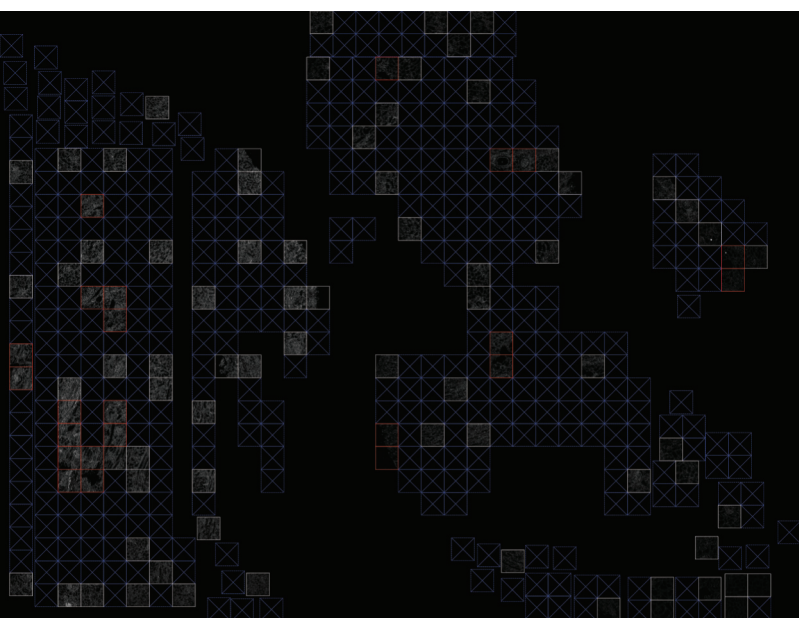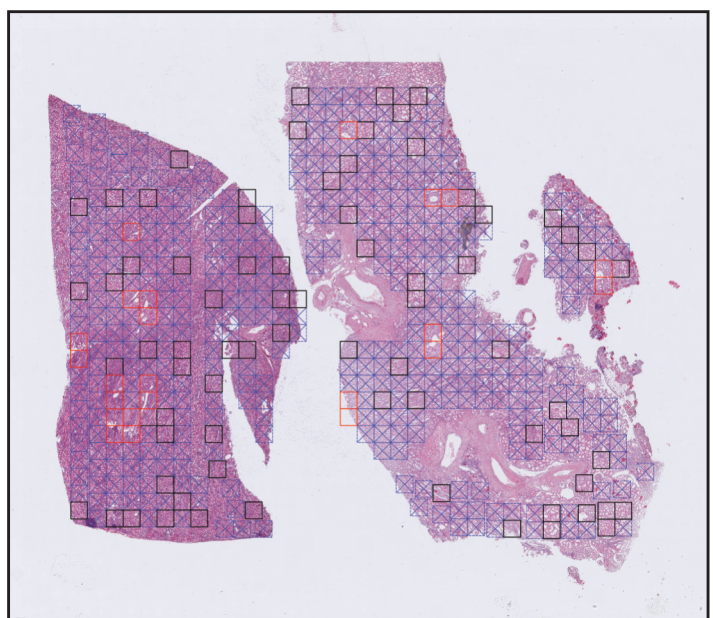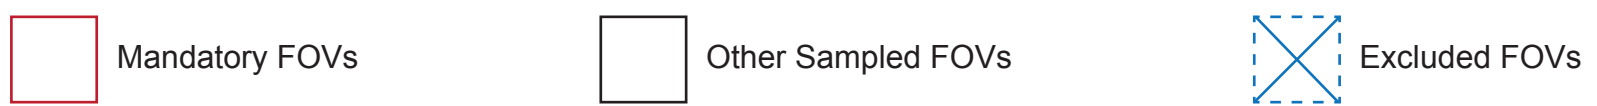

Supplement: Supplementary file 5 [file 98e32c81a9334b76f61cdabd.pdf]
