# Supplementary figures and images for: Cross-Modality Alignment of Spatial Transcriptomics, Multiplexed Imaging, and Histology with PHARAOH
Source: Research Square preprint supplement (doi:10.21203/rs.3.rs-9954002/v1), 2026-06-19

# Supplementary Figure 7

**a**

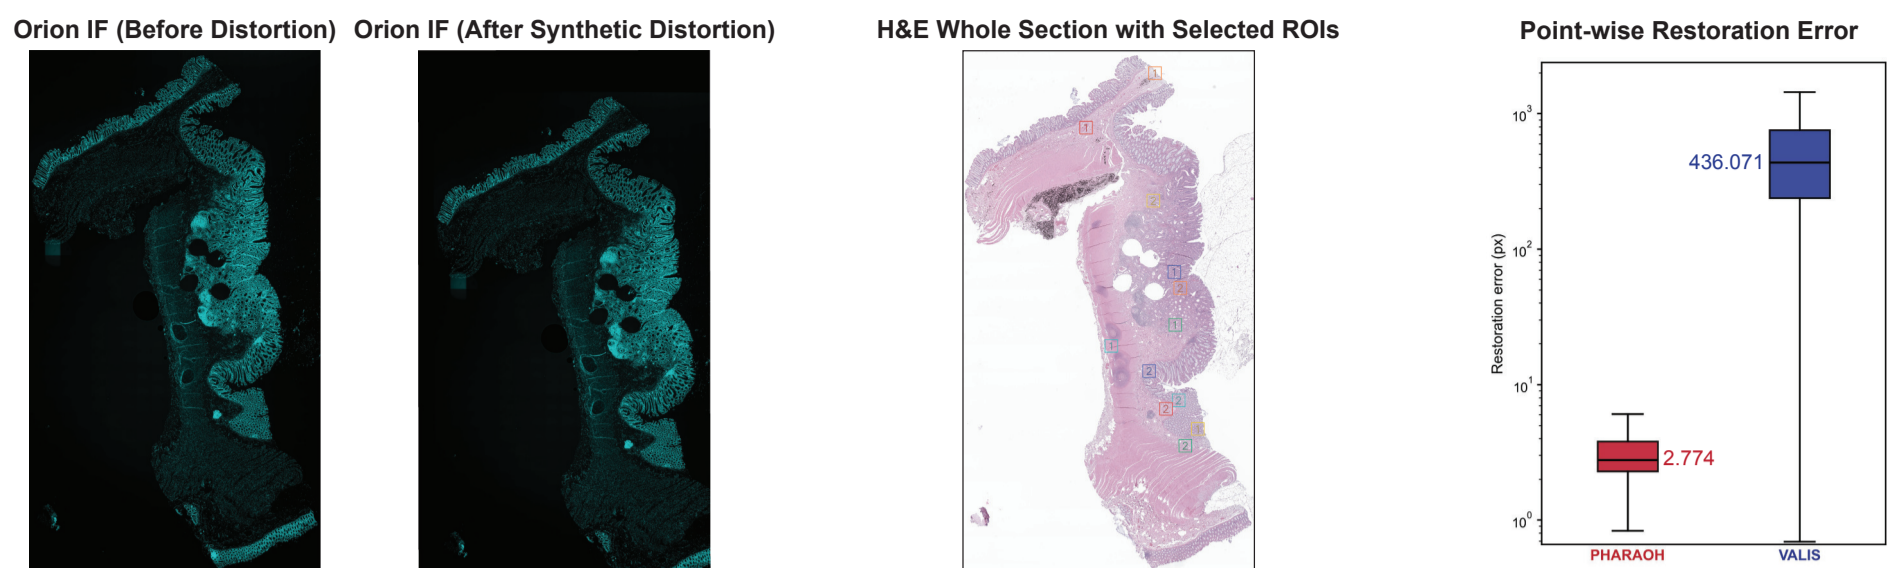

**b**

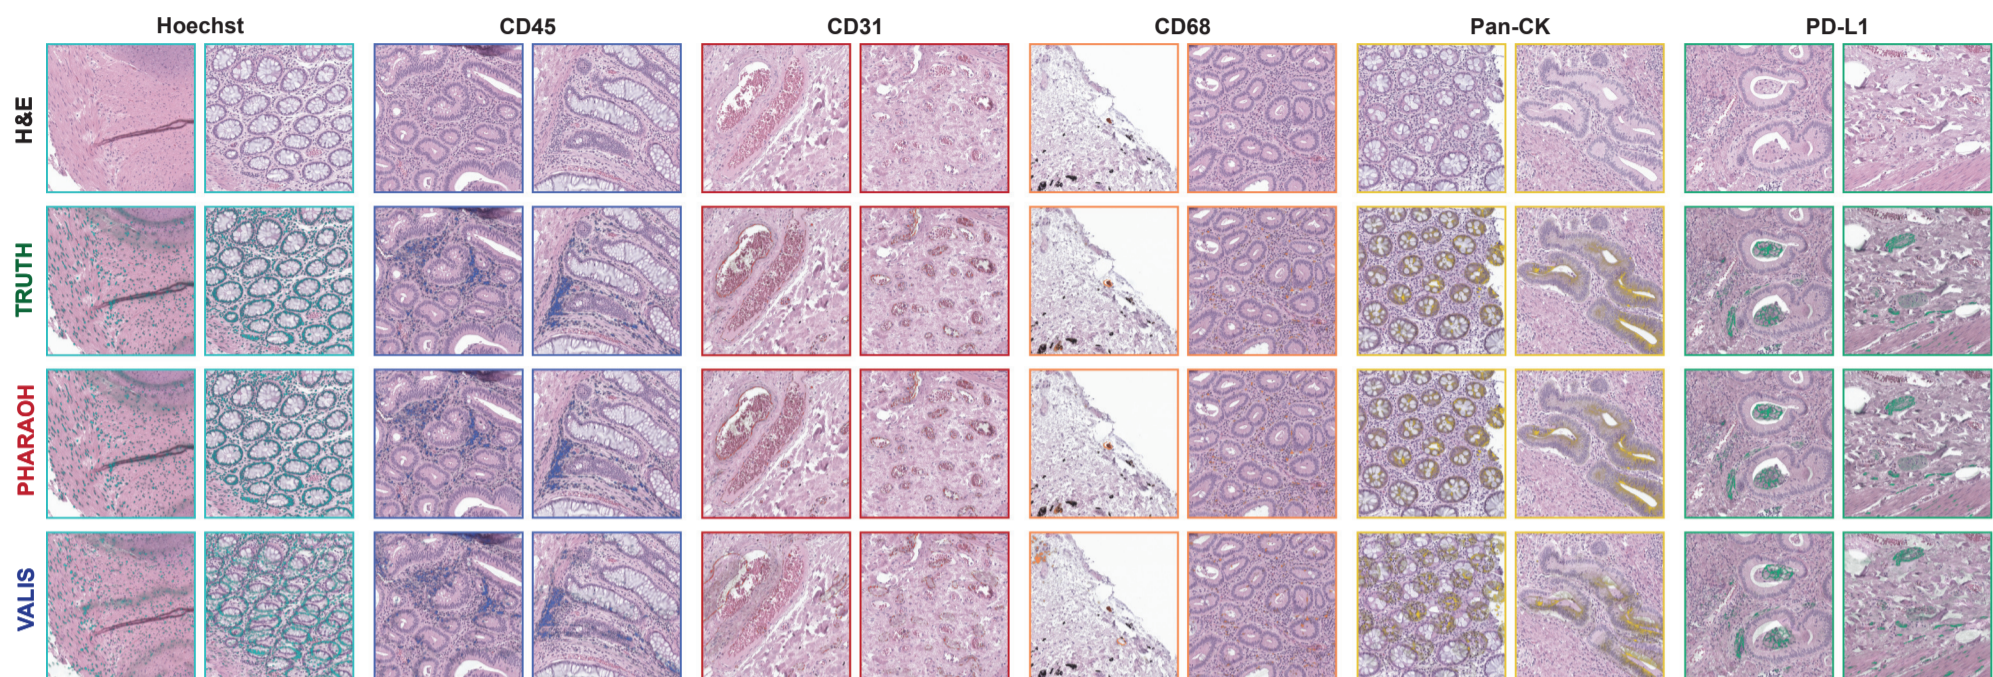

**c**

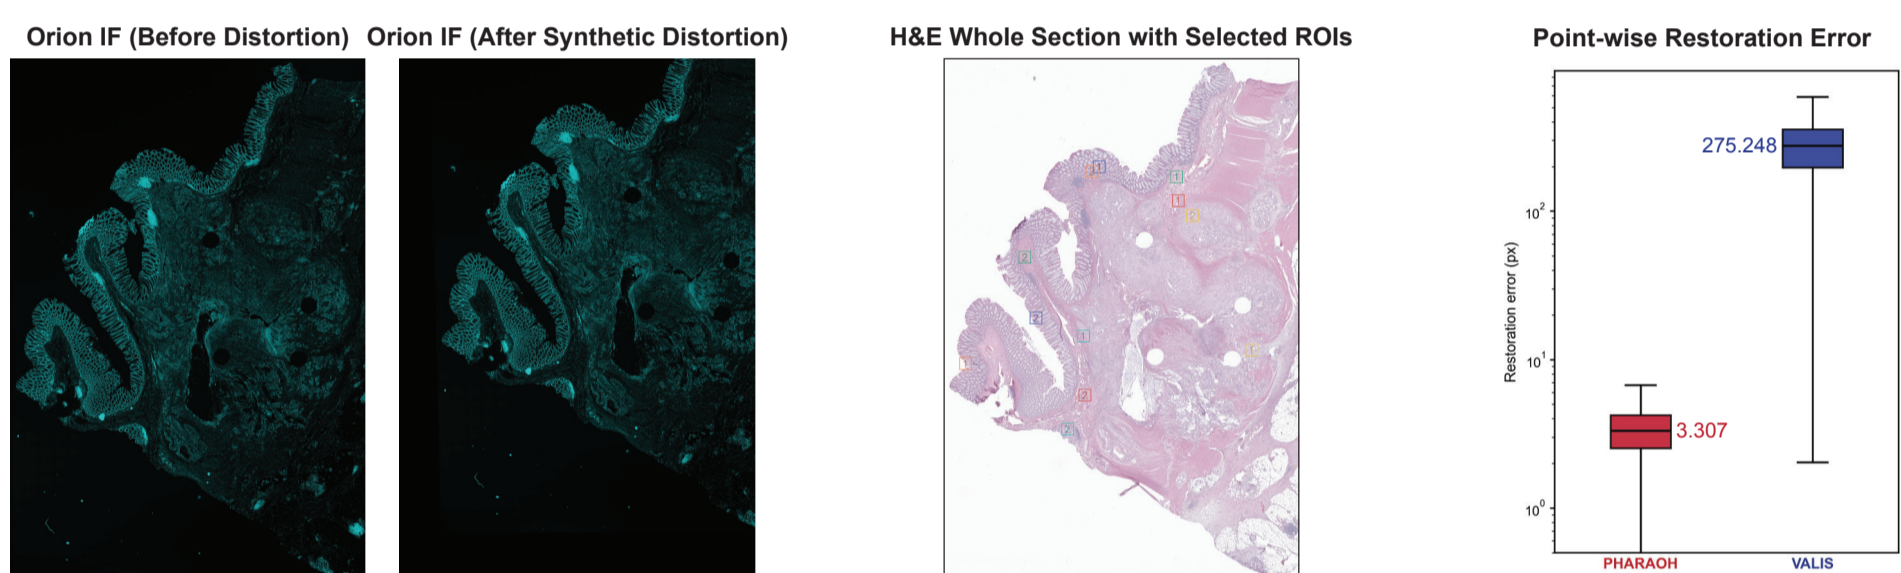

**d**

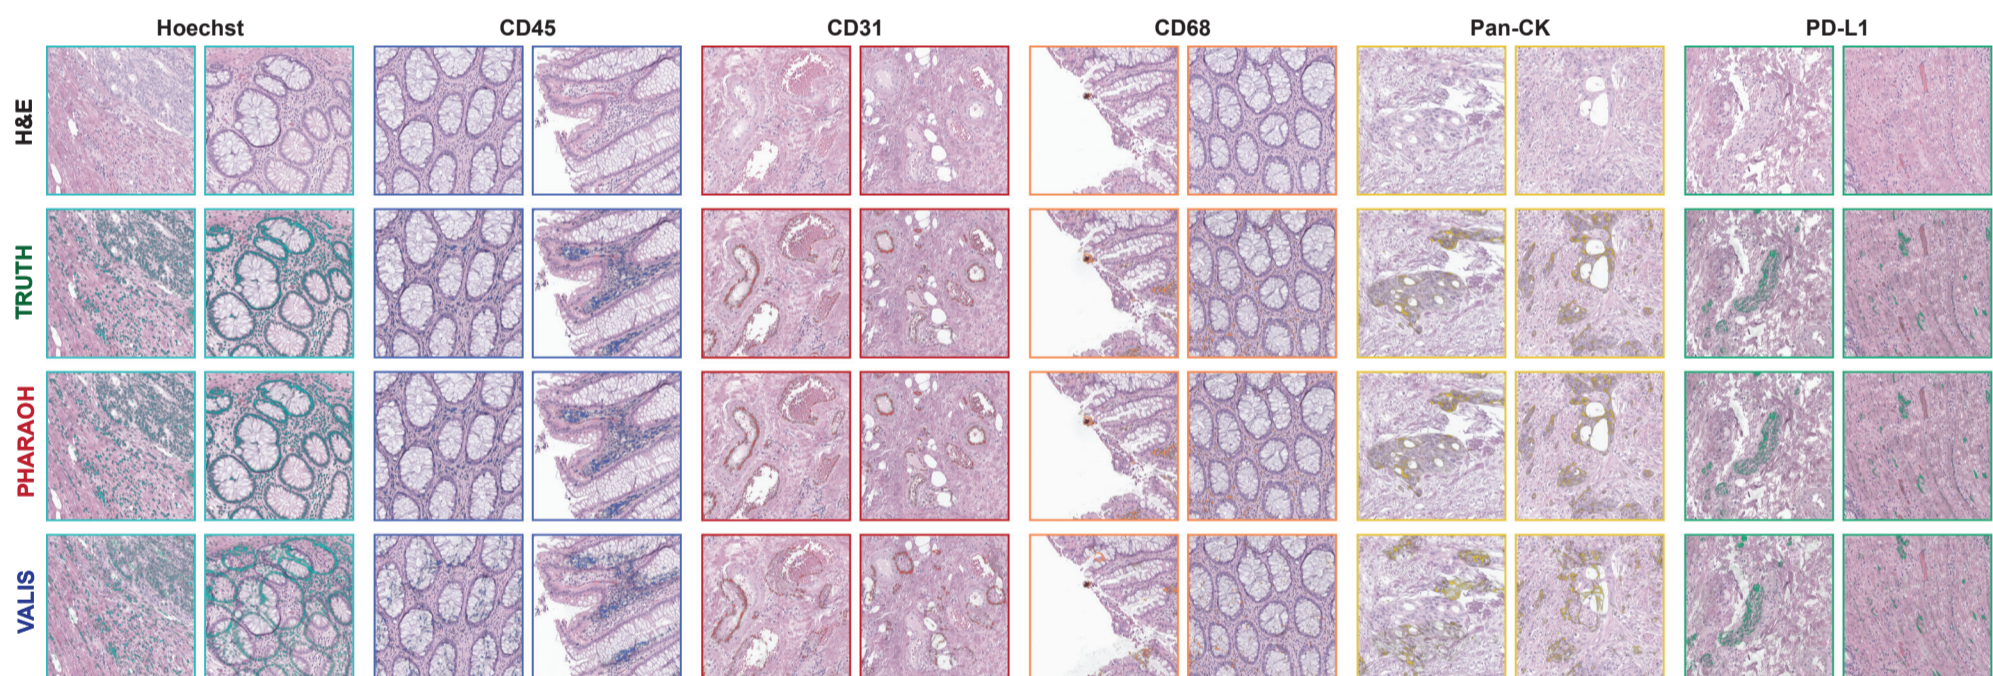

**e**

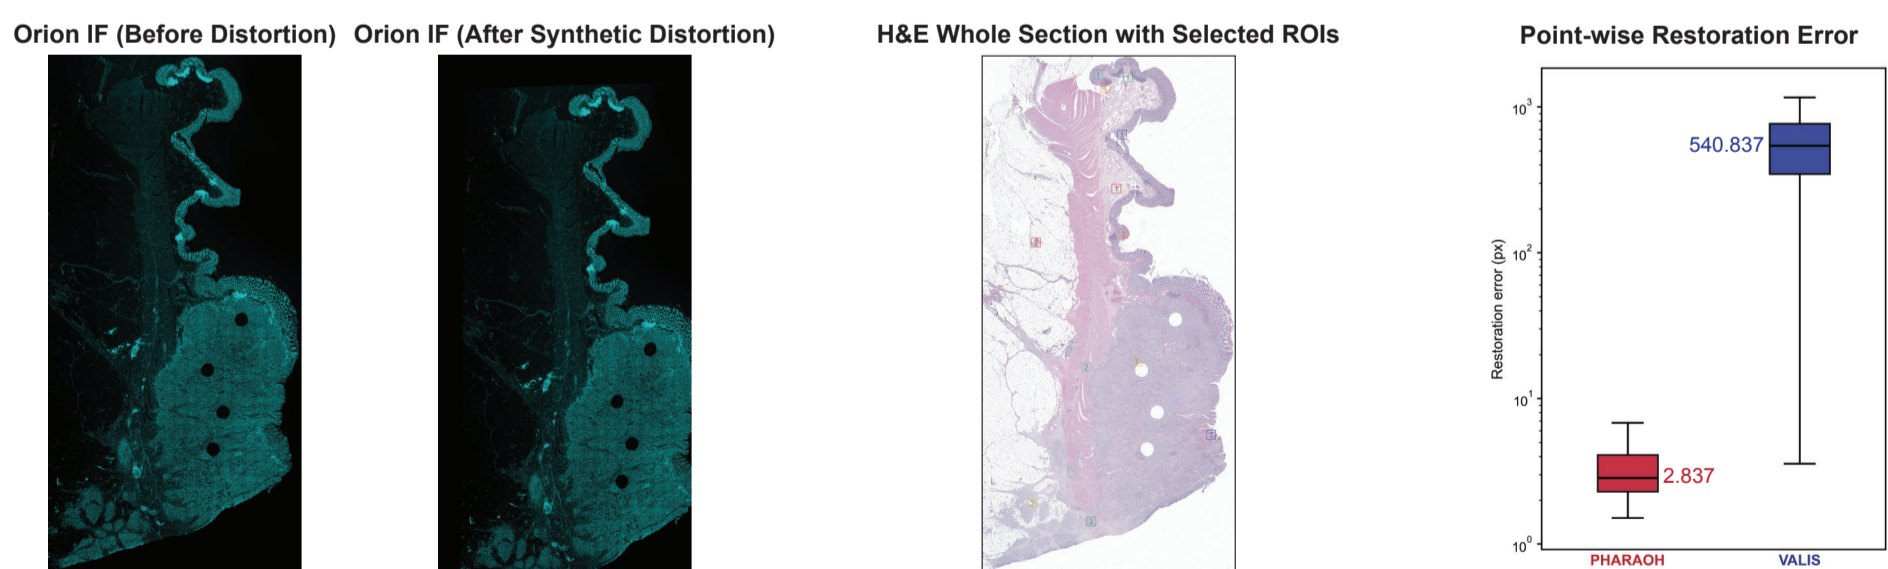

**f**

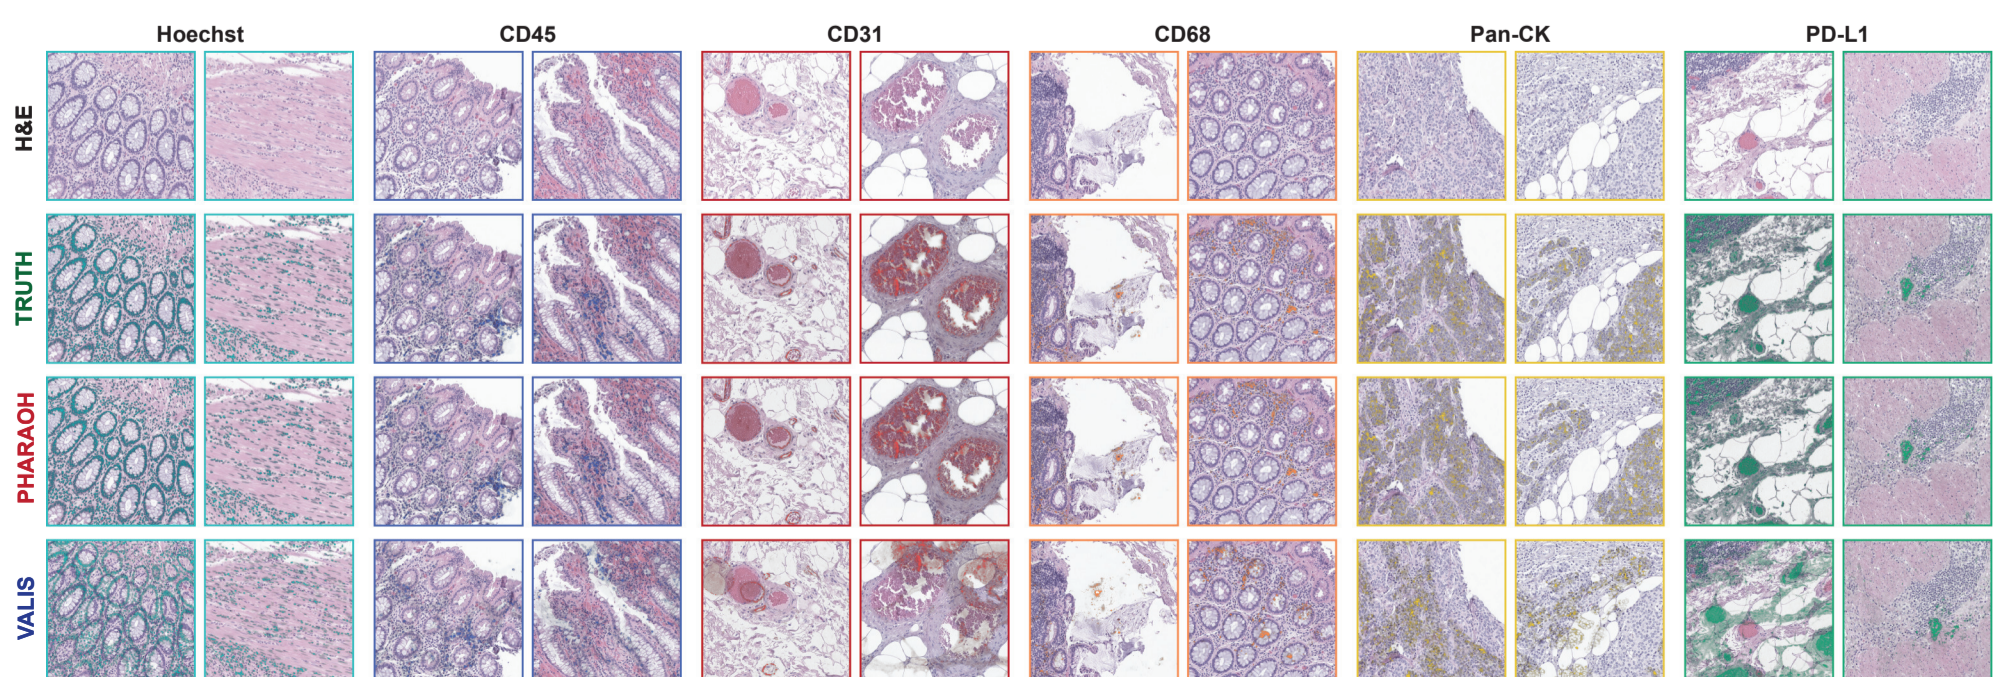

Supplement: Supplementary file 2 [file 603092c053a9e3e3337ad7fa.pdf]

# Supplementary Figure 6

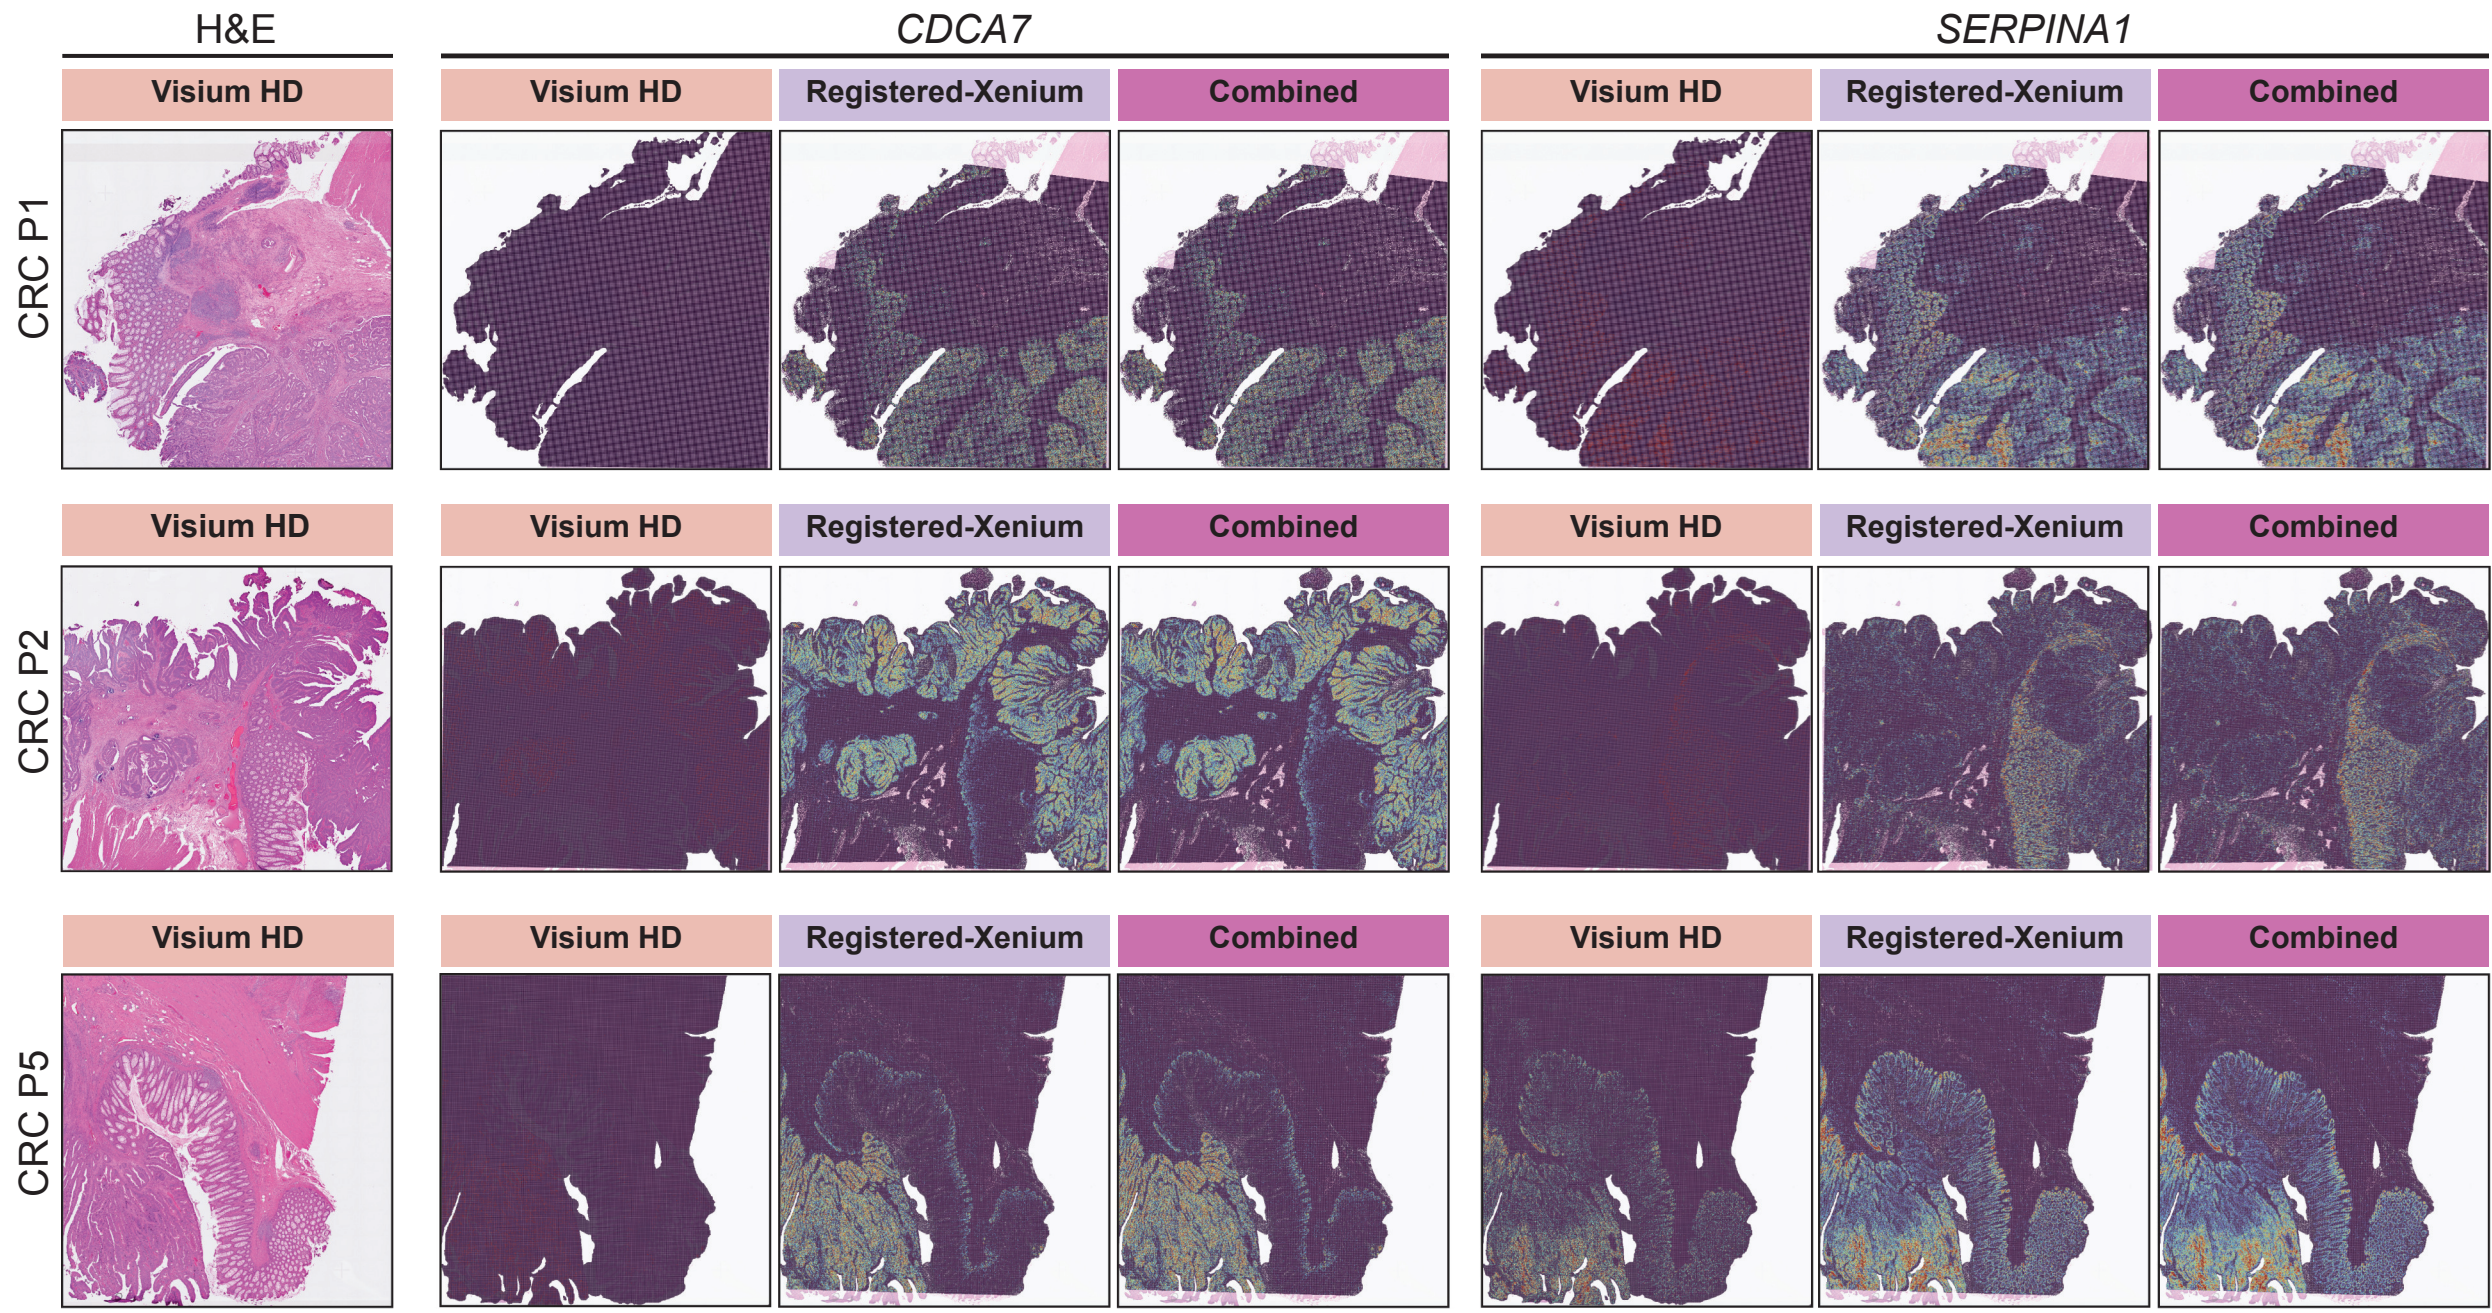

Supplement: Supplementary file 3 [file 7768450d4decba5301ac26f0.pdf]

# Supplementary Figure 1

**a**

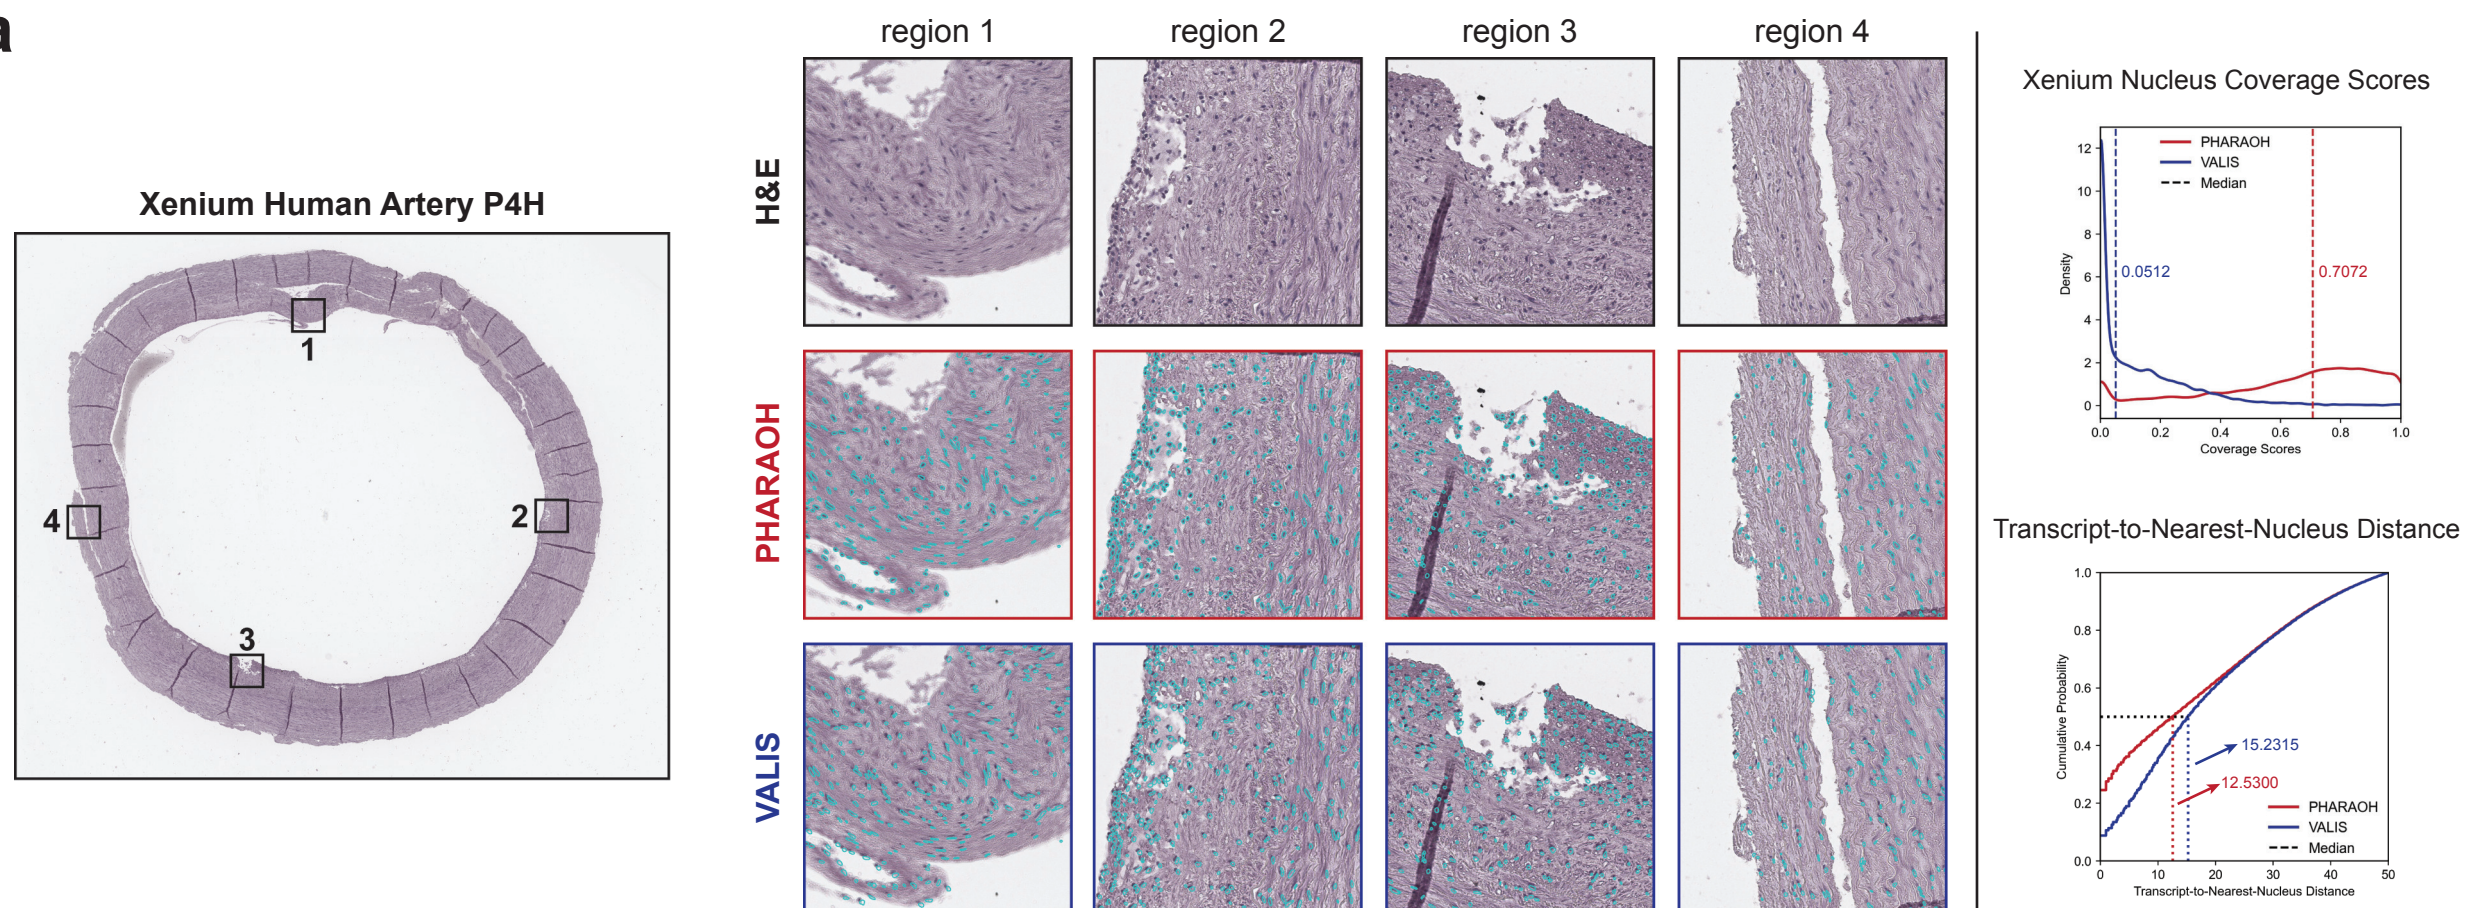

**b**

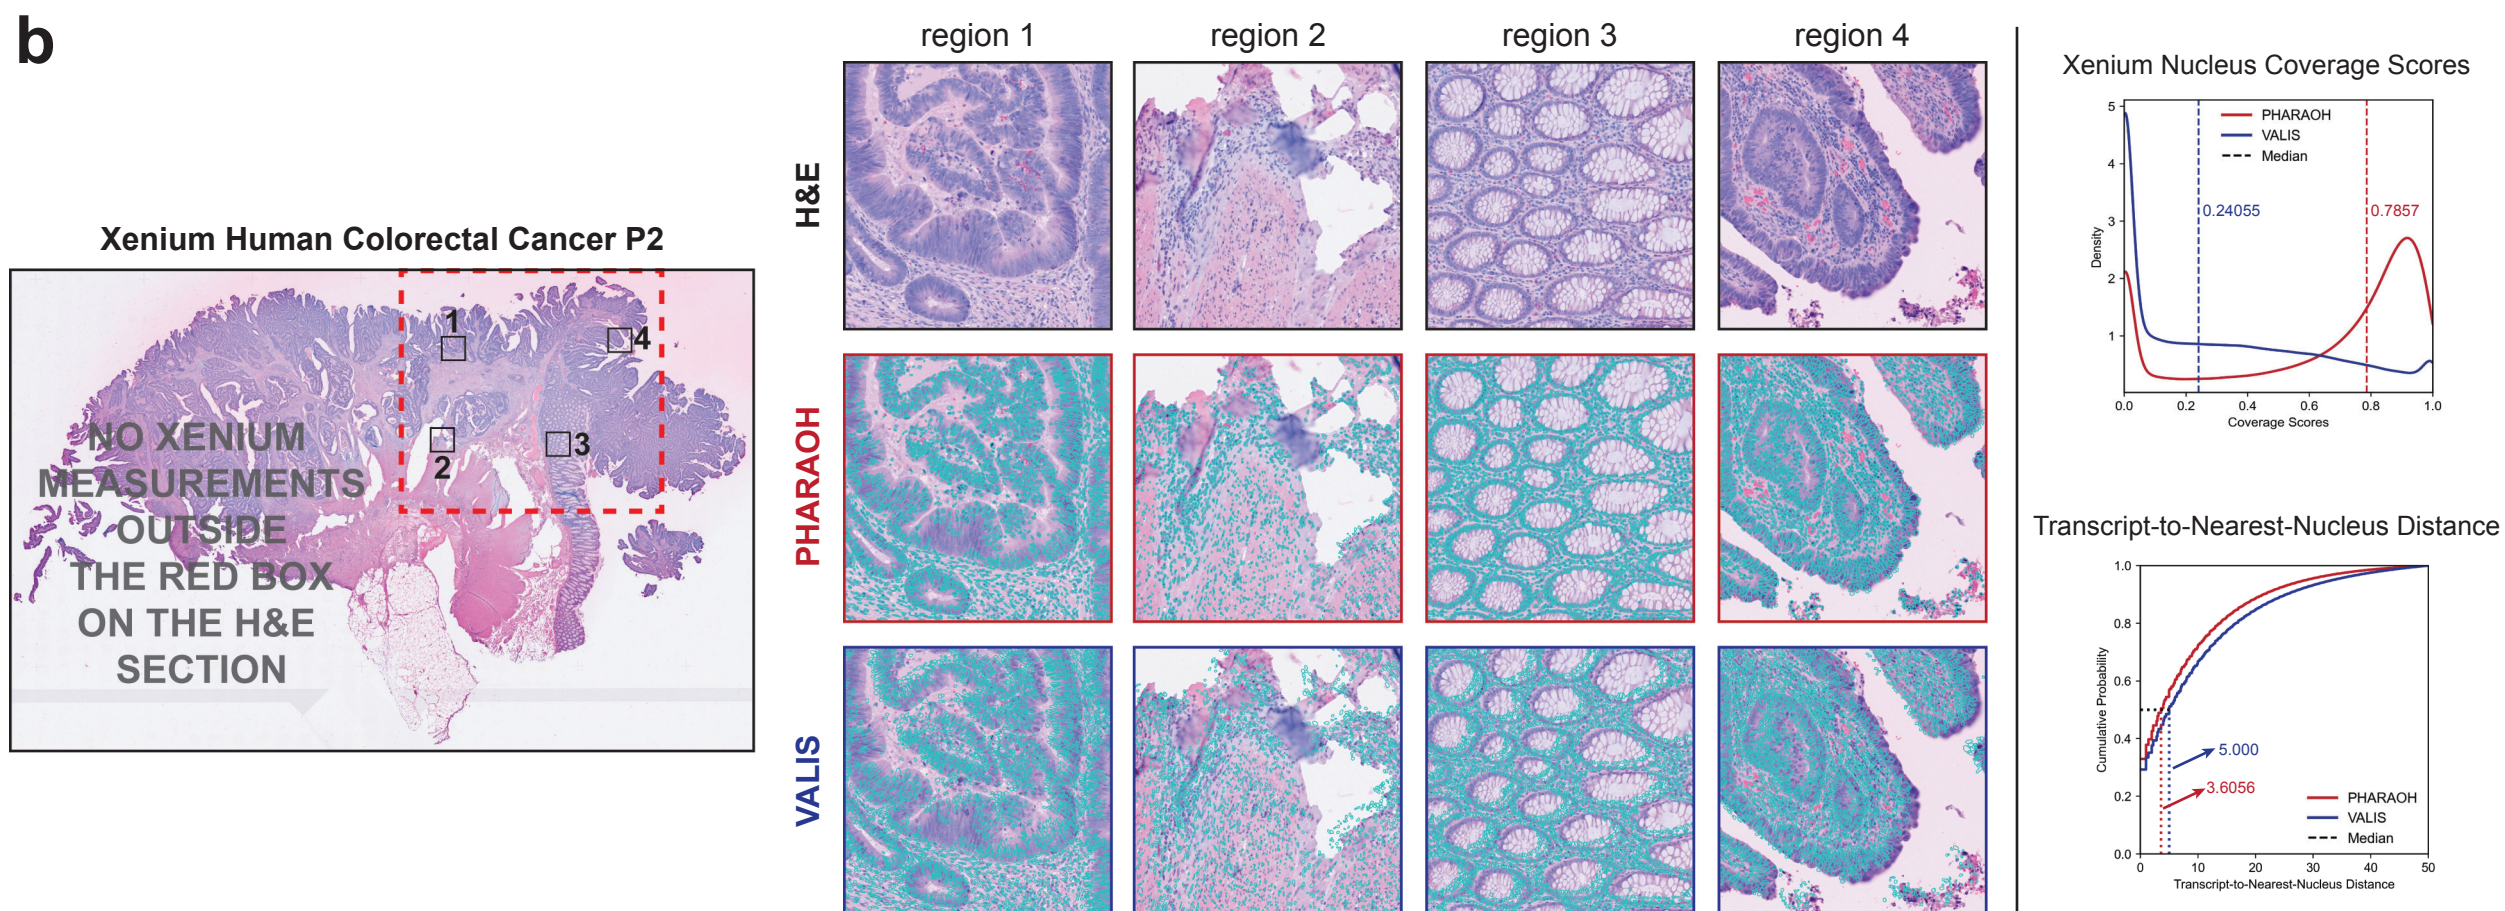

**c**

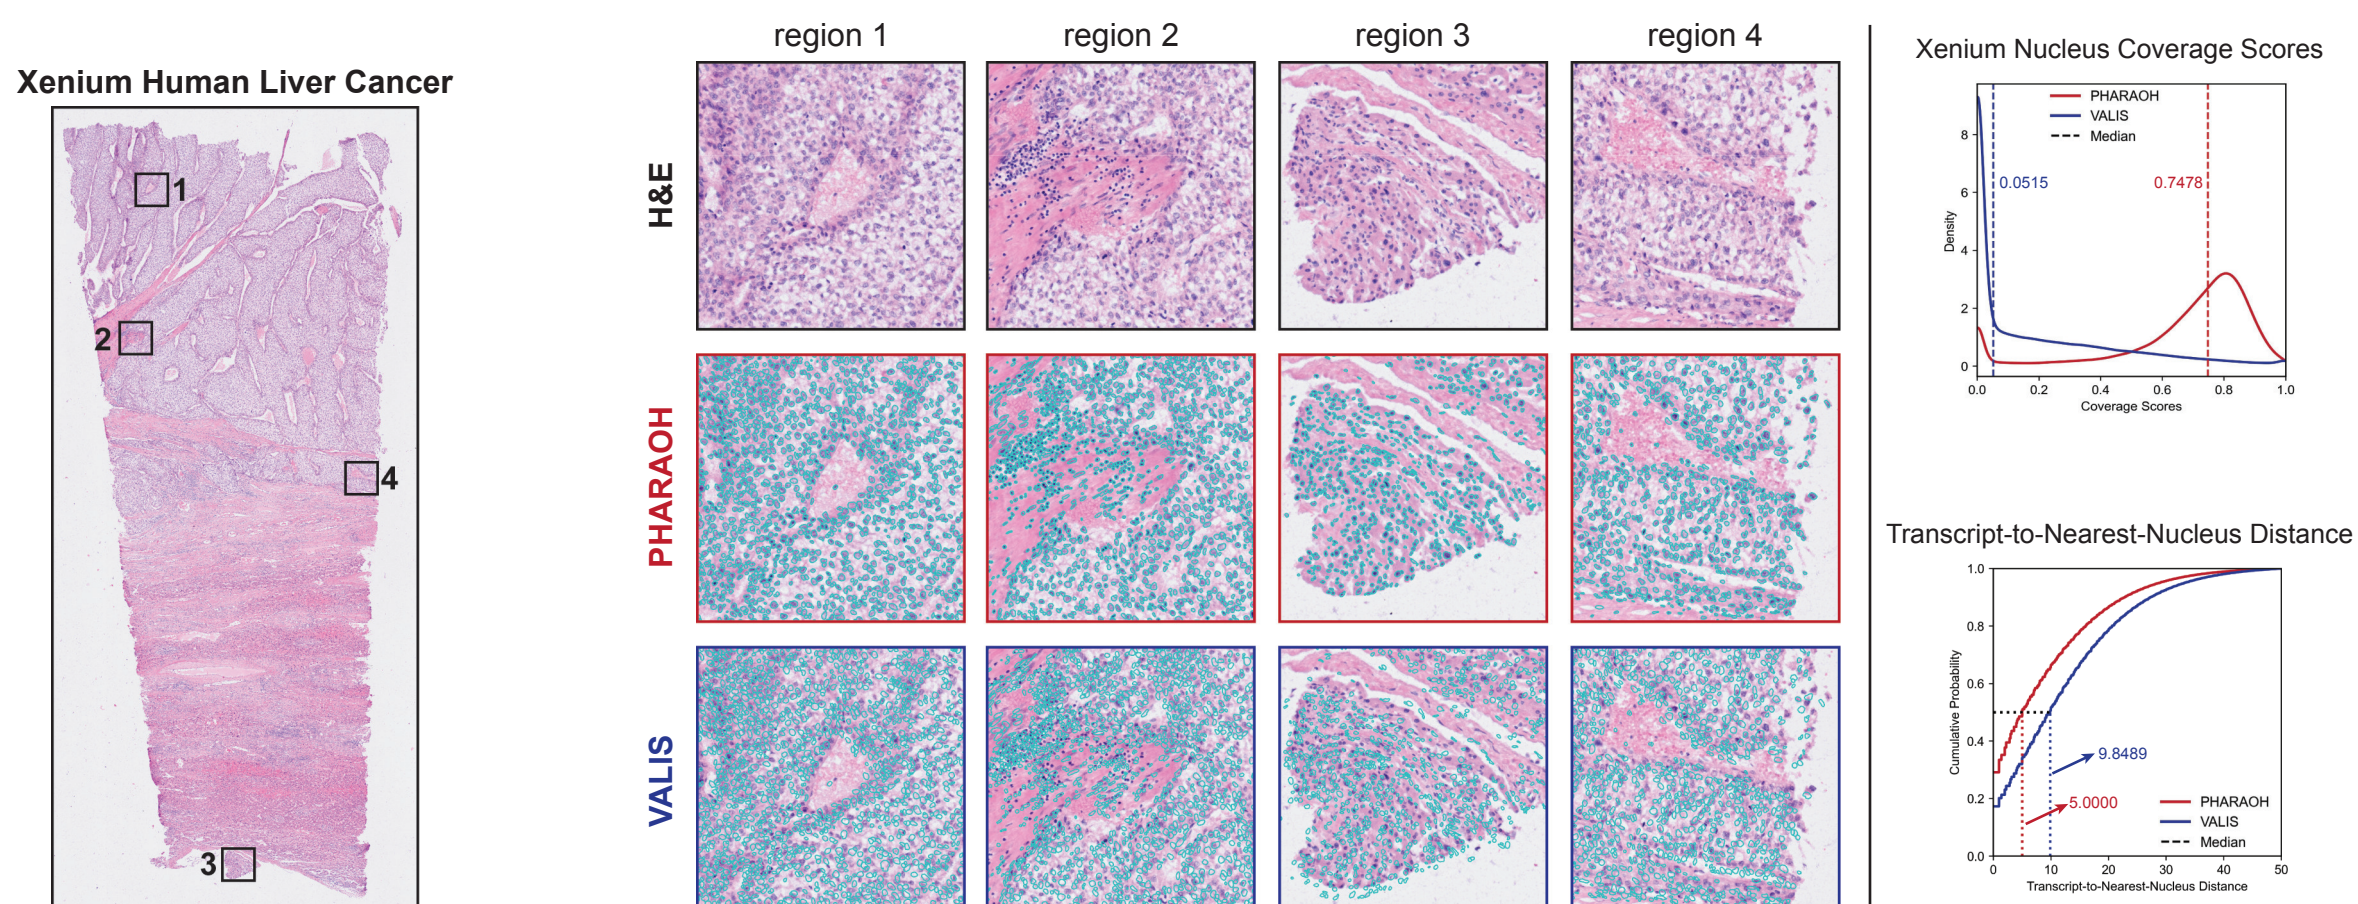

Supplement: Supplementary file 7 [file cb20d6d83ac48c0dd6538565.pdf]
